# Supplementary material for: Comparative Investigation and Trends of Respiratory Viruses using Wastewater-Based Epidemiological Surveillance in Patras, Greece
Source: Research Square preprint supplement (doi:10.21203/rs.3.rs-7262979/v1), 2025-08-07
Supplement: Supplementary file 1 [file c615c2d5bcba371c3e53b331.docx]

**Supplementary Table 1**

Mean values of viral genome copies normalized/100.000 inhabitants, per ISO week

|  |  | Mean values of genome copies normalized/100.000 inhabitants | | | | | |
| --- | --- | --- | --- | --- | --- | --- | --- |
| **ISO week** |  | **HAdV** | **INF A** | **INF B** | **RSV** | **Rhinoviruses** | **Sars CoV-2** |
| **2022-40** |  | 6,35364E+13 | <LOD | <LOD | <LOD | 1,06E+12 | 1,05E+12 |
| **2022-41** |  | 5,3054E+12 | <LOD | <LOD | <LOD | 8,21E+11 | 1,15E+12 |
| **2022-42** |  | 2,77896E+12 | <LOD | <LOD | <LOD | 5,65E+11 | 3,73E+11 |
| **2022-43** |  | 1,02392E+13 | <LOD | <LOD | <LOD | 7,75E+11 | 6,83E+11 |
| **2022-44** |  | 2,2784E+13 | <LOD | <LOD | <LOD | 4,51E+11 | 4,51E+11 |
| **2022-45** |  | 8,07667E+12 | <LOD | <LOD | <LOD | 1,02E+12 | 1,56E+11 |
| **2022-46** |  | 6,07566E+12 | <LOD | <LOD | 6,42E+10 | 3,05E+11 | 4,5E+11 |
| **2022-47** |  | 3,49211E+13 | <LOD | <LOD | 3,44E+11 | 1,58E+11 | 1,44E+11 |
| **2022-48** |  | 1,11068E+13 | <LOD | <LOD | 2,44E+10 | <LOD | 2,73E+11 |
| **2022-49** |  | 4,19343E+13 | <LOD | <LOD | 2,12E+11 | <LOD | 3,61E+11 |
| **2022-50** |  | 8,82066E+12 | 4,2E+11 | <LOD | 2,12E+11 | 6,78E+11 | 2,17E+12 |
| **2022-51** |  | 3,46851E+13 | 5,04E+11 | <LOD | 2,07E+11 | 5,83E+11 | 8,97E+10 |
| **2022-52** |  | 1,6345E+13 | 5,34E+11 | <LOD | 3,4E+11 | 7,15E+11 | 5,48E+11 |
| **2023-1** |  | 1,05206E+13 | 3,64E+11 | <LOD | 6,23E+11 | 5,9E+11 | 1,3E+11 |
| **2023-2** |  | 8,92077E+13 | 2,81E+11 | <LOD | 5,06E+11 | 1,64E+12 | 1,03E+12 |
| **2023-3** |  | 1,3044E+13 | 5,87E+11 | <LOD | 3,33E+11 | 1,79E+12 | 1,89E+11 |
| **2023-4** |  | 2,09471E+13 | 5,03E+11 | <LOD | 5,2E+11 | 1,59E+12 | 2,1E+11 |
| **2023-5** |  | 1,18847E+13 | 7,35E+11 | <LOD | 1,66E+11 | 1,68E+12 | 2,23E+11 |
| **2023-6** |  | 2,04666E+13 | 7,23E+11 | 1,59E+11 | 1,56E+11 | 6E+11 | 1,48E+12 |
| **2023-7** |  | 1,20361E+13 | 4,16E+11 | 2,89E+11 | 4,76E+11 | 7,1E+11 | 1,97E+12 |
| **2023-8** |  | 3,51089E+13 | 2,12E+11 | 2,14E+11 | 4,58E+11 | 1,51E+12 | 4,97E+12 |
| **2023-9** |  | 2,84879E+13 | 1,78E+11 | 2,28E+11 | 6,95E+11 | 3,41E+11 | 8,06E+11 |
| **2023-10** |  | 8,44035E+13 | 2,02E+11 | 1,88E+11 | 6,2E+11 | 1,76E+11 | 2,52E+12 |
| **2023-11** |  | 1,22515E+13 | <LOD | 2,75E+11 | 2,07E+11 | <LOD | 4,13E+12 |
| **2023-12** |  | 2,57919E+13 | <LOD | 2,77E+11 | <LOD | 1,39E+11 | 7,85E+11 |
| **2023-13** |  | 3,54134E+12 | <LOD | 2,15E+11 | <LOD | <LOD | 1,31E+13 |

**Supplementary Table 2**

|  | **% positivity of random Rapid Ag test** | | |
| --- | --- | --- | --- |
| **ISO Week** | **SARS-CoV 2** | **Influenza A/B** | **RSV A/B** |
| **2022-50** | 26% | 14% | 9% |
| **2022-51** | 24% | 16% | 13% |
| **2022-52** | 26% | 18% | 11% |
| **2023-1** | 32% | 12% | 11% |
| **2023-2** | 26% | 7% | 12% |
| **2023-3** | 25% | 5% | 11% |
| **2023-4** | 22% | 5% | 6% |
| **2023-5** | 23% | 4% | 6% |
| **2023-6** | 26% | 5% | 4% |
| **2023-7** | 20% | 8% | 4% |
| **2023-8** | 22% | 7% | 1% |
| **2023-9** | 23% | 10% | 1% |
| **2023-10** | 18% | 5% | 2% |
| **2023-11** | 14% | 4% | 2% |
| **2023-12** | 24% | 7% | 1% |
| **2023-13** | 17% | 4% | 0% |
